# Supplementary material for: Role of ultrasound and CT in the early diagnosis and surgical treatment of primary sternal osteomyelitis caused by Salmonella: Case reports
Source: PubMed Central journal article supplement — Exp Ther Med. 2021 Jan 7;21(3):189. doi: 10.3892/etm.2021.9620 (PMC7812590; doi:10.3892/etm.2021.9620), 2021-01-07

Figure S1. Intraoperative photographs of a sequestrum moved in the pleural cavity around the mesosternum for case A. (A) Black arrow indicates the sequestrum. (B) Black arrow indicates the pleural cavity.

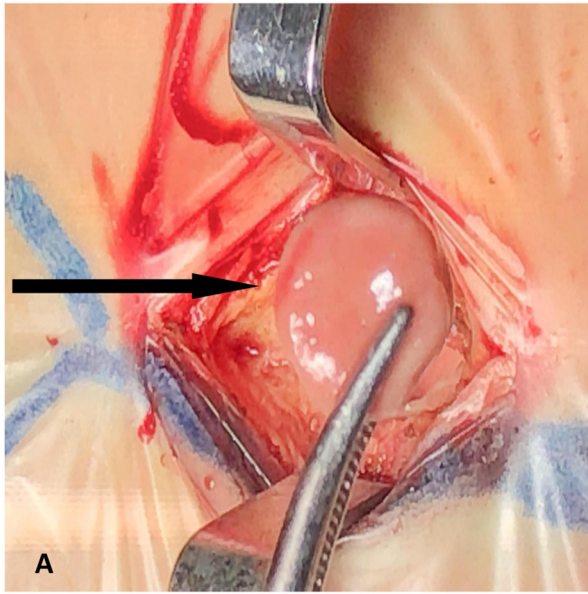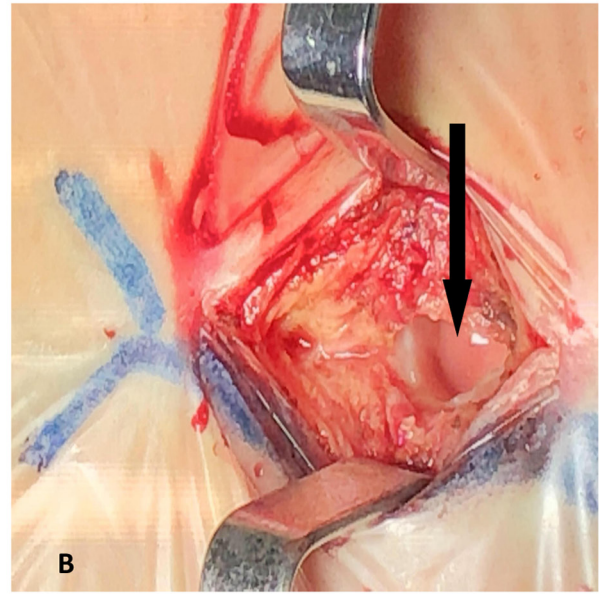

Supplement: Supplementary_Data.pdf [file Supplementary_Data.pdf]
